# Supplementary material for: Transcriptomic responses to environmental temperature by turtles with temperature-dependent and genotypic sex determination assessed by RNAseq inform the genetic architecture of embryonic gonadal development
Source: PubMed Central journal article supplement (PMC5352168; doi:10.1371/journal.pone.0172044), 2017-03-15

## SUPPLEMENTAL FIGURE 1

**Title:** Transcriptomic responses to environmental temperature by turtles with thermosensitive and genotypic sex determination assessed by RNAseq inform the genetic architecture of embryonic gonadal development

**Authors:** Srihari Radhakrishnan<sup>1,4</sup>, Robert Literman<sup>2,4</sup>, Jennifer Neuwald<sup>4,5</sup>, Andrew Severin<sup>3,4</sup>, Nicole Valenzuela<sup>\*4</sup>

\*corresponding author; Email: nvalenzu@iastate.edu

**Figure S1:** *Chrysemys picta* - Novel transcripts that are highly differentially-expressed (while controlling false discoveries at  $1e-10$ ). Blue: upregulated at 26°C, red: upregulated at 31°C.

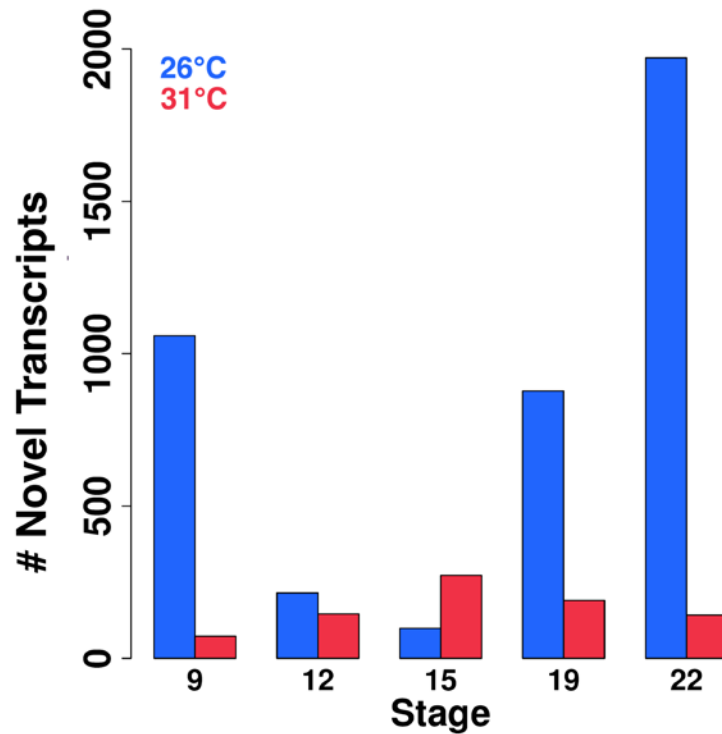

Supplement: pone.0172044.s001.pdf [file pone.0172044.s001.pdf]
