# Supplementary material for: Transcriptomic responses to environmental temperature by turtles with temperature-dependent and genotypic sex determination assessed by RNAseq inform the genetic architecture of embryonic gonadal development
Source: PubMed Central journal article supplement (PMC5352168; doi:10.1371/journal.pone.0172044), 2017-03-15

SUPPLEMENTAL FIGURE 2

**Title:** Transcriptomic responses to environmental temperature by turtles with thermosensitive and genotypic sex determination assessed by RNAseq inform the genetic architecture of embryonic gonadal development

**Authors:** Srihari Radhakrishnan<sup>1, 4</sup>, Robert Literman<sup>2, 4</sup>, Jennifer Neuwald<sup>4, 5</sup>, Andrew Severin<sup>3, 4</sup>, Nicole Valenzuela\*<sup>4</sup>

\*corresponding author; Email: nvalenzu@iastate.edu

**Figure S2:** RNA-seq expression patterns for multiple genes previously implicated in mammalian urogenadal development across developmental stages 9-22 at 26°C (blue) and 31°C (red) in *Chrysemys picta* and *Apalone spinifera*. Statistically significant differences are indicated with an asterisk (\*). Thermosensitive period is indicated by a box.

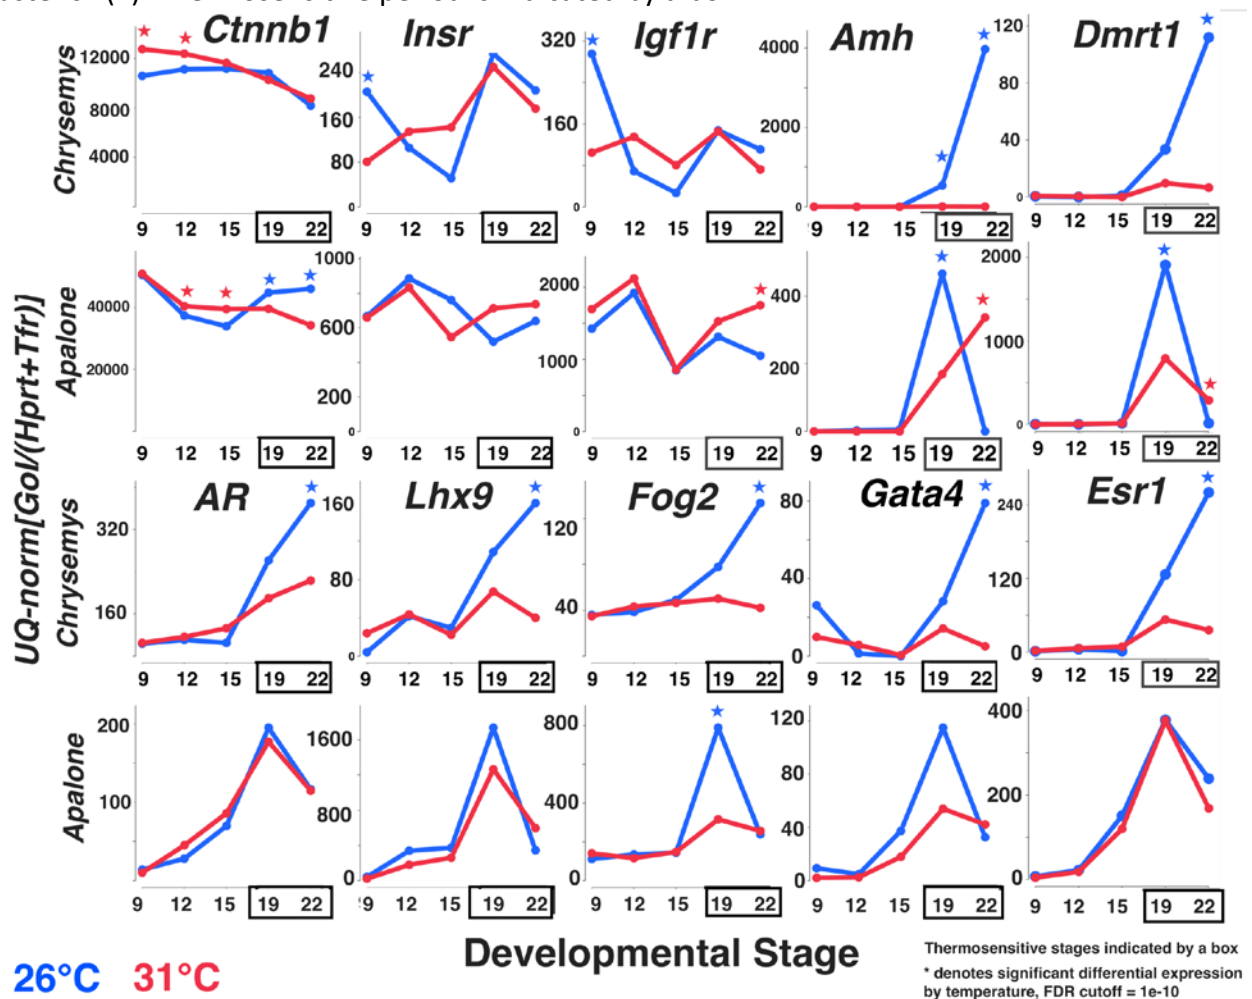

Supplement: pone.0172044.s002.pdf [file pone.0172044.s002.pdf]
