# Supplementary material for: Transcriptomic responses to environmental temperature by turtles with temperature-dependent and genotypic sex determination assessed by RNAseq inform the genetic architecture of embryonic gonadal development
Source: PubMed Central journal article supplement (PMC5352168; doi:10.1371/journal.pone.0172044), 2017-03-15

### SUPPLEMENTAL FIGURE 3

**Title:** Transcriptomic responses to environmental temperature by turtles with thermosensitive and genotypic sex determination assessed by RNAseq inform the genetic architecture of embryonic gonadal development

**Authors:** Srihari Radhakrishnan<sup>1,4</sup>, Robert Literman<sup>2,4</sup>, Jennifer Neuwald<sup>4,5</sup>, Andrew Severin<sup>3,4</sup>, Nicole Valenzuela<sup>\*4</sup>

\*corresponding author; Email: nvalenzu@iastate.edu

**Figure S3:** Gene co-expression patterns by temperature for each turtle species from the RNA-seq data. Panels a-d illustrate modules of high (red) and low (yellow) co-expression for 981 genes of interest (described in Table 3) profiled across five developmental stages in *Chrysemys picta* [(a) and (b)] and *Apalone spinifera* [(c) and (d)] at 26°C and 31°C respectively.

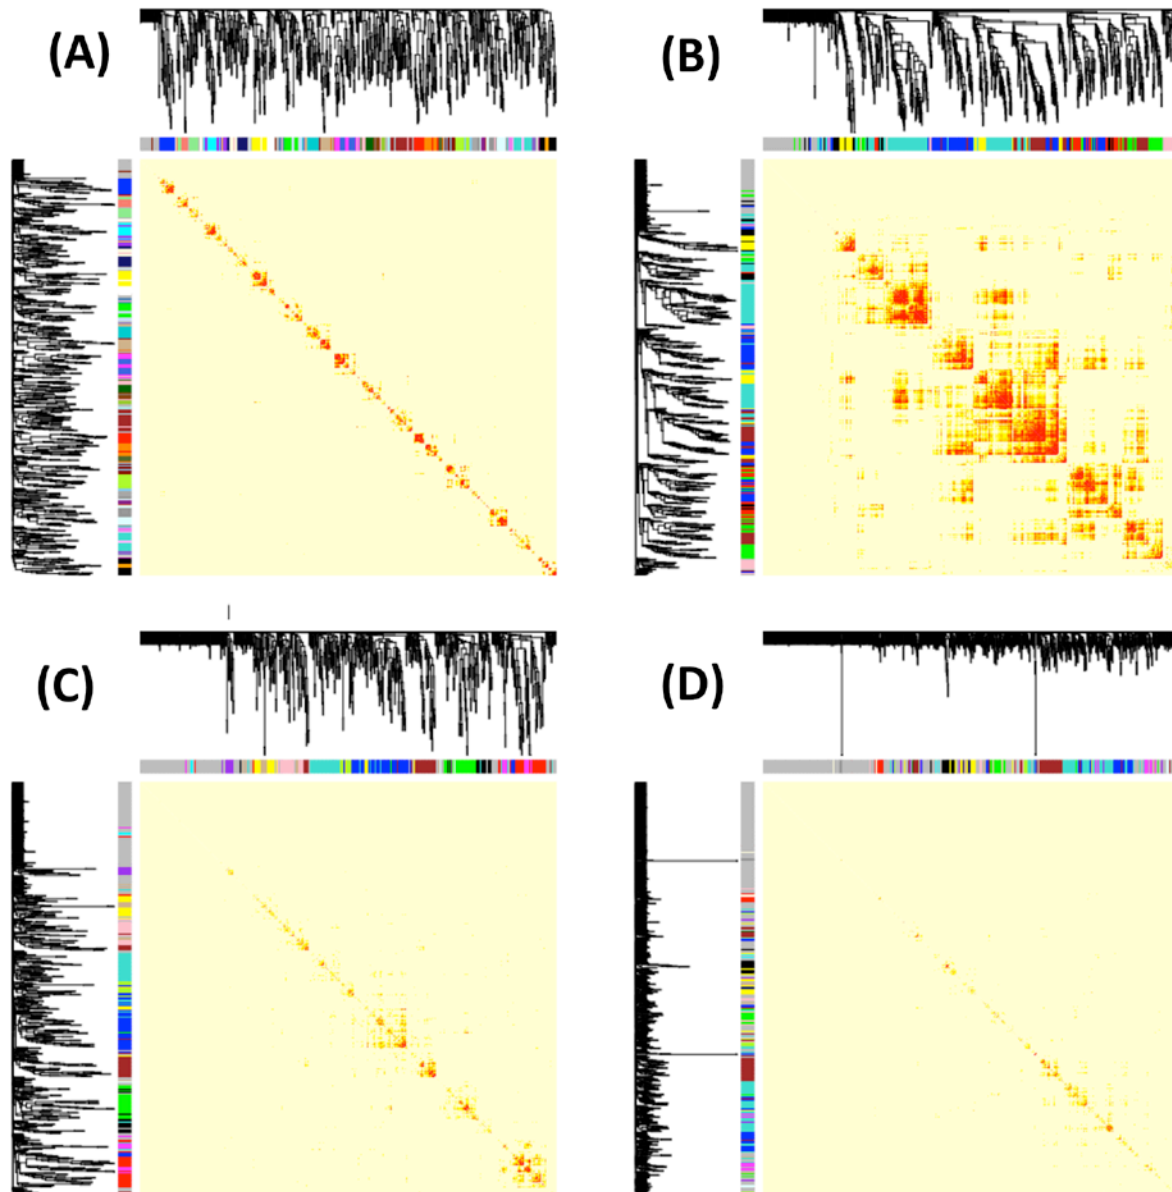

Supplement: pone.0172044.s003.pdf [file pone.0172044.s003.pdf]
