# Supplementary material for: Transcriptomic responses to environmental temperature by turtles with temperature-dependent and genotypic sex determination assessed by RNAseq inform the genetic architecture of embryonic gonadal development
Source: PLoS One. 2017 Mar 15;12(3):e0172044. doi: 10.1371/journal.pone.0172044 (PMC5352168; doi:10.1371/journal.pone.0172044)
Supplement: S7 Table — (XLSX) [file pone.0172044.s010.xlsx]

## Sheet: S7-AMI-MPT
	MPT-biased genes in Alligator mississippiensis	Chrysemys picta					Apalone spinifera
Gene	Description	Stage 9	Stage 12	Stage 15	Stage 19	Stage 22	Stage 9	Stage 12	Stage 15	Stage 19	Stage 22
XM_005299744	apolipoprotein_A-I_(APOA1)_mRNA	-1.05e-96	-6.87e-41	-3.34e-31	1.65e-06	2.67e-143	-7.6e-46	5.14e-15	2.16e-54	-2.1e-197	0.191
XM_005280895	solute_carrier_family_23_(ascorbic_acid_transporter)_member_1_(SLC23A1)_mRNA	-1.71e-15	-0.101	-2.94e-05	-1.41e-15	3.99e-43	-1	1.71e-07	2.88e-18	0.515	-3.84e-62
XM_005289448	glutathione_S-transferase_pi_1_(GSTP1)_mRNA	1.09e-06	-1.52e-15	-0.000255	2.01e-33	2.45e-197	-4.06e-09	6.82e-19	0.00546	1	-4.27e-05
XM_005299342	fibrinogen_beta_chain_(FGB)_transcript_variant_X1_mRNA	-2.06e-06	0.541	-1.39e-41	-8.11e-21	6.91e-26	1	-6.36e-43	-2.09e-197	-2.1e-197	-0.000686
XM_005279198	biliverdin_reductase_B_(flavin_reductase_(NADPH))_(BLVRB)_mRNA	2.51e-31	-8.59e-06	-6.08e-18	7.69e-151	8.17e-108	-0.226	1.3e-17	0.0431	0.137	1.44e-19
XM_005310615	interferon-related_developmental_regulator_1_(IFRD1)_mRNA	0.692	-7.41e-09	-1.1e-12	-0.0109	-0.3	-0.00139	-0.786	-0.399	1.23e-05	-0.794
XM_005279398	nuclear_receptor_subfamily_5_group_A_member_1_(NR5A1)_mRNA	0.239	0.651	-0.132	-8.85e-20	-1.64e-119	0.406	0.143	0.858	-0.172	-0.283
XM_005283858	anti-Mullerian_hormone_(AMH)_mRNA	1	-1	-1	-1.02e-147	-2.45e-197	1	-0.395	-0.103	-7.54e-32	4.12e-100
XM_005295303	matrilin_4_(MATN4)_mRNA	0.0667	-0.692	2.52e-77	-2.8e-67	-2.45e-197	-0.00328	7.51e-18	2.09e-197	-1.55e-30	-5.02e-09
XM_005290772	sterol_O-acyltransferase_1_(SOAT1)_transcript_variant_X1_mRNA	-1.26e-09	0.162	0.833	-9.99e-11	-0.888	0.989	0.402	0.507	3.9e-08	-0.0836
XM_005299365	calbindin_1_28kDa_(CALB1)_mRNA	1	-1	0.863	-2.05e-21	1.28e-13	0.251	1.06e-33	1.08e-99	1.28e-96	-2.8e-197
XM_005282774	Niemann-Pick_disease_type_C1_(NPC1)_mRNA	-2.1e-08	0.00458	0.114	-2.37e-09	-1.23e-11	2.71e-06	-0.0195	0.569	-8.88e-37	2.66e-05
XM_005302103	v-myc_avian_myelocytomatosis_viral_oncogene_lung_carcinoma_derived_homolog_(MYCL)_transcript_variant_X1_mRNA	-0.172	1	-0.00149	0.993	-3.98e-15	-0.736	-0.646	1	-1	-0.336
XM_005303605	Mov10_Moloney_leukemia_virus_10_homolog_(mouse)_(MOV10)_mRNA	-1	1	-0.842	1	-6.45e-16	-1	0.186	-0.103	0.169	-0.588
XM_005307745	anti-Mullerian_hormone_receptor_type_II_(AMHR2)_mRNA	-1	-1	0.103	-0.792	-1.48e-59	1	-0.842	0.0155	-0.71	-0.238
XM_005278604	C-type_lectin_domain_family_3_member_B_(CLEC3B)_transcript_variant_X1_mRNA	0.449	-0.939	5.37e-08	0.883	2.14e-22	-0.643	0.89	-0.103	2.17e-06	9.14e-30
XM_005279659	macrophage_stimulating_1_(hepatocyte_growth_factor-like)_(MST1)_mRNA	0.92	-1	-0.721	0.688	0.00539	-0.406	1	-5.85e-05	-3.77e-05	-0.0894
XM_005280096	collagen_type_IX_alpha_1_(COL9A1)_mRNA	2.06e-06	-1	6.86e-21	0.906	-0.987	-1.73e-08	5.79e-06	2.09e-197	-0.00735	0.0201
XM_005281270	cAMP_responsive_element_binding_protein_3-like_3_(CREB3L3)_mRNA	-0.0308	1	0.807	0.000125	1.13e-11	-0.329	0.629	0.00103	-1.72e-06	0.921
XM_005281397	glycosylphosphatidylinositol_specific_phospholipase_D1_(GPLD1)_mRNA	-1	1	0.695	-0.581	5.73e-15	-1	-0.0442	-0.0446	-1.17e-09	-1
XM_005281831	chloride_channel_voltage-sensitive_Kb_(CLCNKB)_mRNA	0.622	-1	1	0.667	-0.0666	0.00959	0.00955	0.000388	1.78e-06	0.000857
XM_005283372	flavin_containing_monooxygenase_2_(non-functional)_(FMO2)_transcript_variant_X1_mRNA	-0.326	0.0744	1	6.35e-05	-0.00361	0.513	0.422	0.605	-0.000908	-0.0458
XM_005283629	transgelin_3_(TAGLN3)_transcript_variant_X1_mRNA	0.00118	-0.927	-0.241	-1	0.399	0.00405	1.53e-23	-8.76e-17	0.00702	0.0253
XM_005283753	hypoxia_inducible_factor_3_alpha_subunit_(HIF3A)_mRNA	-0.151	0.419	0.955	2.78e-26	-0.371	-0.0026	1.84e-09	-0.000303	4.28e-10	0.00018
XM_005283996	testis_expressed_15_(TEX15)_mRNA	-0.162	-1	0.266	-0.572	-0.00711	0.441	-2.01e-06	0.00854	-2.96e-08	-0.134
XM_005284479	growth_arrest-specific_2_like_2_(GAS2L2)_mRNA	-0.969	-1	0.221	-0.572	-0.179	-0.237	0.413	-0.00684	-0.0203	0.558
XM_005285668	proteolipid_protein_1_(PLP1)_transcript_variant_X1_mRNA	-1	-0.758	0.00109	0.417	-5.98e-07	0.16	-1	-0.339	0.000863	0.00278
XM_005285924	amnion_associated_transmembrane_protein_(AMN)_mRNA	-0.539	-0.894	0.178	-1	1.2e-22	0.737	0.4	5.76e-19	-0.0754	0.621
XM_005285999	eukaryotic_translation_initiation_factor_4A2_(EIF4A2)_transcript_variant_X1_mRNA	3.59e-17	2.5e-09	5.72e-45	3.19e-18	5.77e-111	3.19e-59	6.96e-96	-4.36e-15	6.07e-58	6.26e-73
XM_005286042	gap_junction_protein_beta_1_32kDa_(GJB1)_transcript_variant_X1_mRNA	-0.637	-0.989	-0.0534	-0.768	0.0464	-0.0188	0.526	-2.51e-36	-0.00947	0.0648
XM_005286067	testis_expressed_11_(TEX11)_mRNA	1	1	-0.695	0.644	-0.957	0.864	-0.395	-0.0165	-0.562	-0.0526
XM_005286554	ankyrin_1_erythrocytic_(ANK1)_mRNA	1	-1	-1	2.53e-14	0.857	0.0157	-0.736	-0.0155	-1	1.03e-31
XM_005286623	heat_shock_105kDa/110kDa_protein_1_(HSPH1)_transcript_variant_X1_mRNA	0.15	4.51e-12	0.0247	-0.55	1	3.21e-94	7.08e-22	2.45e-10	2.81e-80	6.3e-08
XM_005287044	solute_carrier_family_45_member_1_(SLC45A1)_transcript_variant_X1_mRNA	0.0587	-1	0.321	0.75	0.00515	-0.172	-0.0796	-1	0.00463	-0.00761
XM_005287229	solute_carrier_family_1_(glutamate/neutral_amino_acid_transporter)_member_4_(SLC1A4)_mRNA	-0.968	1	0.0181	0.139	1.64e-35	-0.000107	-0.534	9.8e-15	-4e-09	-9.6e-05
XM_005287523	malic_enzyme_3_NADP(+)-dependent_mitochondrial_(ME3)_transcript_variant_X1_mRNA	-1	0.395	3.48e-05	0.341	3.91e-05	0.000594	3.21e-05	0.000274	4.5e-14	-0.584
XM_005288403	transmembrane_protein_adipocyte_asscociated_1_(TPRA1)_transcript_variant_X1_mRNA	0.103	-0.179	-0.167	1	0.256	-0.0165	0.0142	0.672	1.59e-06	0.624
XM_005288671	calcium_binding_protein_1_(CABP1)_transcript_variant_X1_mRNA	0.812	0.722	1	1	0.255	0.614	0.00222	0.744	0.429	0.0222
XM_005288928	solute_carrier_family_5_(sodium/inositol_cotransporter)_member_11_(SLC5A11)_mRNA	-0.179	-0.987	0.242	-0.0193	2.49e-19	-1	0.423	-0.469	-4.41e-05	-2.96e-17
XM_005292515	interferon-induced_protein_with_tetratricopeptide_repeats_5_(IFIT5)_mRNA	0.92	-1	0.469	-0.0726	-0.0243	0.695	1	1	0.345	0.342
XM_005293474	dopamine_beta-hydroxylase_(dopamine_beta-monooxygenase)_(DBH)_mRNA	0.563	1	0.537	2.73e-12	7.75e-16	-0.247	0.0223	1	2.1e-197	1.56e-77
XM_005294490	DnaJ_(Hsp40)_homolog_subfamily_A_member_4_(DNAJA4)_mRNA	2.91e-12	1.3e-08	0.531	7.97e-25	1.02e-11	6.25e-39	2.43e-08	0.00372	0.0157	-8.92e-16
XM_005294508	BOC_cell_adhesion_associated_oncogene_regulated_(BOC)_transcript_variant_X1_mRNA	-1	0.0806	0.205	1.39e-18	7.88e-05	0.521	3.19e-12	6.91e-18	1.48e-06	2.3e-16
XM_005294649	GRB10_interacting_GYF_protein_1_(GIGYF1)_mRNA	-0.139	0.992	-0.984	0.103	-0.231	1	1	-0.000642	0.0133	0.000195
XM_005294762	DEAD_(Asp-Glu-Ala-Asp)_box_polypeptide_58_(DDX58)_transcript_variant_X1_mRNA	1	0.819	0.128	-0.839	-0.0191	-0.478	0.00153	0.136	-0.131	0.598
XM_005294976	spectrin_beta_erythrocytic_(SPTB)_transcript_variant_X1_mRNA	0.571	0.556	0.166	1.2e-39	3.55e-24	0.831	-0.266	0.021	-0.00762	2.09e-138
XM_005295468	transient_receptor_potential_cation_channel_subfamily_C_member_4_associated_protein_(TRPC4AP)_mRNA	-0.441	-0.687	-0.828	-0.0082	-0.85	-0.221	-0.478	-3.83e-128	-0.0121	0.00417
XM_005296022	WD_repeat_domain_6_(WDR6)_mRNA	-0.56	1	-0.00221	0.47	-0.935	0.975	0.168	0.0717	0.352	0.012
XM_005297450	ferredoxin_reductase_(FDXR)_mRNA	-1	-0.0951	-0.245	-5.59e-10	-1.45e-10	-0.821	0.165	0.105	-0.0372	0.133
XM_005297538	cytoglobin_(CYGB)_transcript_variant_X1_mRNA	-0.0743	1	0.735	0.484	-0.458	-0.703	0.305	-0.0545	-0.0672	0.00201
XM_005297542	ST6_(alpha-N-acetyl-neuraminyl-23-beta-galactosyl-13)-N-acetylgalactosaminide_alpha-26-sialyltransferase_2_(ST6GALNAC2)_mRNA	-0.785	1	0.0172	0.0293	1.28e-10	-0.38	-0.197	-2.76e-15	-6.09e-08	-0.805
XM_005297714	phosphoserine_aminotransferase_1_(PSAT1)_transcript_variant_X1_mRNA	-0.057	-0.00779	0.00137	-5.04e-08	1.03e-21	-0.524	0.113	3.04e-47	-9.33e-11	-0.0234
XM_005298186	purinergic_receptor_P2X_ligand-gated_ion_channel_5_(P2RX5)_mRNA	1	-0.973	-1	-0.719	-1	1	0.168	0.143	-0.621	-0.0274
XM_005298283	serpin_peptidase_inhibitor_clade_F_(alpha-2_antiplasmin_pigment_epithelium_derived_factor)_member_1_(SERPINF1)_mRNA	1.21e-06	0.153	1.37e-05	7.77e-34	9.01e-29	-0.000605	1.1e-09	1.06e-11	1.63e-09	9.74e-38
XM_005298742	myosin_XVIIIB_(MYO18B)_mRNA	-1	0.329	0.000226	2.76e-06	8.93e-06	-7.8e-05	-0.395	-0.605	0.0278	9.8e-10
XM_005299391	carbonic_anhydrase_XIII_(CA13)_transcript_variant_X1_mRNA	1.15e-11	0.435	0.313	7.07e-28	3.95e-103	1.31e-07	-0.00113	-0.00868	-2.1e-197	8.35e-16
XM_005299567	piwi-like_RNA-mediated_gene_silencing_1_(PIWIL1)_mRNA	1	0.973	1	-0.6	-0.513	-0.194	-0.842	-2.18e-09	-6.75e-29	-3.29e-25
XM_005299974	actin_alpha_cardiac_muscle_1_(ACTC1)_transcript_variant_X1_mRNA	4.78e-51	0.000197	1.02e-13	3.6e-197	2.45e-197	8.1e-30	9.01e-197	2.09e-197	-2.14e-55	2.8e-197
XM_005300662	alanyl_(membrane)_aminopeptidase_(ANPEP)_mRNA	-1	0.000104	8.31e-11	3.78e-86	1.55e-48	1	5.59e-11	0.176	7.22e-25	5.54e-08
XM_005300928	palmdelphin_(PALMD)_mRNA	4.83e-05	-1	0.0453	0.459	0.416	3.67e-06	-0.604	0.00294	-4.09e-50	4.34e-57
XM_005301958	solute_carrier_family_4_(anion_exchanger)_member_1_(SLC4A1)_mRNA	-0.00166	0.997	0.357	6.63e-110	8.58e-71	0.00586	-0.02	-0.882	0.503	5.25e-43
XM_005302101	tRNA_isopentenyltransferase_1_(TRIT1)_transcript_variant_X1_mRNA	0.0227	0.808	-1	0.546	-0.395	0.00375	0.112	0.303	0.0157	-0.191
XM_005302461	lectin_galactoside-binding_soluble_2_(LGALS2)_mRNA	4.93e-07	0.973	-0.411	0.000156	1.32e-27	1	1	1	0.345	-1
XM_005303295	carboxypeptidase_A3_(mast_cell)_(CPA3)_transcript_variant_X1_mRNA	1	-1	1	0.498	0.00956	1	1	-0.0165	4.79e-11	0.658
XM_005303377	ectonucleotide_pyrophosphatase/phosphodiesterase_2_(ENPP2)_transcript_variant_X1_mRNA	-0.00153	0.184	-0.347	-7.12e-06	-0.331	0.162	-0.311	2.07e-85	-5.12e-133	3.84e-16
XM_005304213	bone_morphogenetic_protein/retinoic_acid_inducible_neural-specific_2_(BRINP2)_mRNA	-0.903	-0.938	0.232	-0.626	-0.224	-0.089	0.0871	1	0.0647	-0.913
XM_005304421	NPC1-like_1_(NPC1L1)_mRNA	1	0.101	-0.902	-1	1	-6.03e-07	0.0234	-0.284	-1	0.0223
XM_005304526	peptidase_domain_containing_associated_with_muscle_regeneration_1_(PAMR1)_transcript_variant_X1_mRNA	0.026	0.693	0.0362	6.12e-18	4.39e-08	0.00406	1.93e-20	6.66e-05	-5.67e-06	1.16e-23
XM_005304651	junctophilin_2_(JPH2)_mRNA	-0.0122	0.291	0.00275	0.00894	0.00267	0.29	0.164	0.00247	4.21e-07	2.8e-197
XM_005305663	protein_tyrosine_phosphatase_receptor-type_Z_polypeptide_1_(PTPRZ1)_transcript_variant_X1_mRNA	-1	0.811	0.113	-0.385	-0.524	0.0112	0.745	0.000997	-3.14e-133	-0.000251
XM_005305974	coagulation_factor_XIII_A1_polypeptide_(F13A1)_mRNA	-0.0277	1	0.00775	0.386	0.544	0.0282	0.44	0.000286	1.19e-11	-0.79
XM_005305975	neuritin_1_(NRN1)_mRNA	1	-0.594	0.428	0.0138	0.0934	1	0.924	-0.191	-2.82e-20	-5.01e-06
XM_005306093	frizzled_family_receptor_5_(FZD5)_mRNA	-0.00658	1	-0.842	1.32e-11	0.00171	-0.958	1	-0.0241	0.000348	-1
XM_005306469	peptidase_M20_domain_containing_1_(PM20D1)_mRNA	-0.0121	-0.0745	0.756	-0.0127	0.0821	-0.0229	-0.000142	-0.031	-0.00418	-6.62e-06
XM_005306470	solute_carrier_family_26_(anion_exchanger)_member_9_(SLC26A9)_mRNA	-7.24e-05	1	1	-1	-0.0123	0.00423	-0.525	-0.0576	1	1
XM_005306527	amidohydrolase_domain_containing_1_(AMDHD1)_mRNA	0.00025	5.21e-05	0.24	1.02e-06	1.04e-20	0.706	0.00013	-5.4e-06	-8.09e-32	-1.56e-06
XM_005306676	carnitine_palmitoyltransferase_1B_(muscle)_(CPT1B)_mRNA	-3.33e-05	-0.836	-0.187	0.859	-1	-0.144	-0.139	-3.79e-06	-0.697	0.718
XM_005307398	MAM_domain_containing_glycosylphosphatidylinositol_anchor_1_(MDGA1)_transcript_variant_X1_mRNA	-0.766	1	1	-1	-1	0.638	0.515	0.269	0.225	0.264
XM_005307756	troponin_I_type_2_(skeletal_fast)_(TNNI2)_transcript_variant_X1_mRNA	-0.924	-0.931	-0.84	0.675	-0.501	-0.825	0.916	-0.987	-0.586	0.00145
XM_005307830	tetraspanin_9_(TSPAN9)_transcript_variant_X1_mRNA	0.563	0.00196	5.07e-15	-0.0111	-0.471	0.00175	-5.64e-14	-0.594	-0.00546	2.98e-10
XM_005308439	desert_hedgehog_(DHH)_mRNA	-0.563	-1	-0.976	0.000926	0.405	-0.144	0.905	0.0519	1	0.00864
XM_005308510	uncoupling_protein_2_(mitochondrial_proton_carrier)_(UCP2)_mRNA	-0.342	-0.0463	1.12e-12	-0.00837	2.45e-197	-0.237	0.633	-1.11e-64	-2.8e-05	-0.739
XM_005308844	regulating_synaptic_membrane_exocytosis_1_(RIMS1)_transcript_variant_X1_mRNA	1	0.879	0.0406	0.318	0.102	1.17e-12	-0.755	0.154	0.000129	0.0216
XM_005309421	integrin_beta_6_(ITGB6)_mRNA	0.58	0.922	0.0121	0.152	-1	-0.146	-0.677	0.634	-1	0.0274
XM_005310158	erythropoietin_receptor_(EPOR)_mRNA	0.0793	-0.0538	-0.0497	1.6e-15	9.16e-07	-0.144	-0.139	1	0.345	0.00019
XM_005313400	myeloperoxidase_(MPO)_mRNA	1	1	0.695	-0.223	0.399	1	1	-0.103	1	0.342
XM_005313698	transmembrane_protease_serine_9_(TMPRSS9)_partial_mRNA	-1	-1	-0.96	1	-0.85	1	1	1	-0.0312	0.191
XM_005313920	N-acetylglucosaminidase_alpha_(NAGLU)_mRNA	-0.0121	0.229	-0.373	0.0068	-0.0103	-0.62	1	0.00111	0.275	5.4e-09
	Highlighted genes include genes in the categories referenced in Tables S2-S11
